# Supplementary material for: New insights into the genomic landscape of meningiomas identified FGFR3 in a subset of patients with favorable prognoses
Source: PubMed Central journal article supplement (PMC6756861; doi:10.18632/oncotarget.27178), 2019-09-17
Supplement: oncotarget-10-5549-s001.pdf [file oncotarget-10-5549-s001.pdf]

# New insights into the genomic landscape of meningiomas identified FGFR3 in a subset of patients with favorable prognoses

## SUPPLEMENTARY MATERIALS

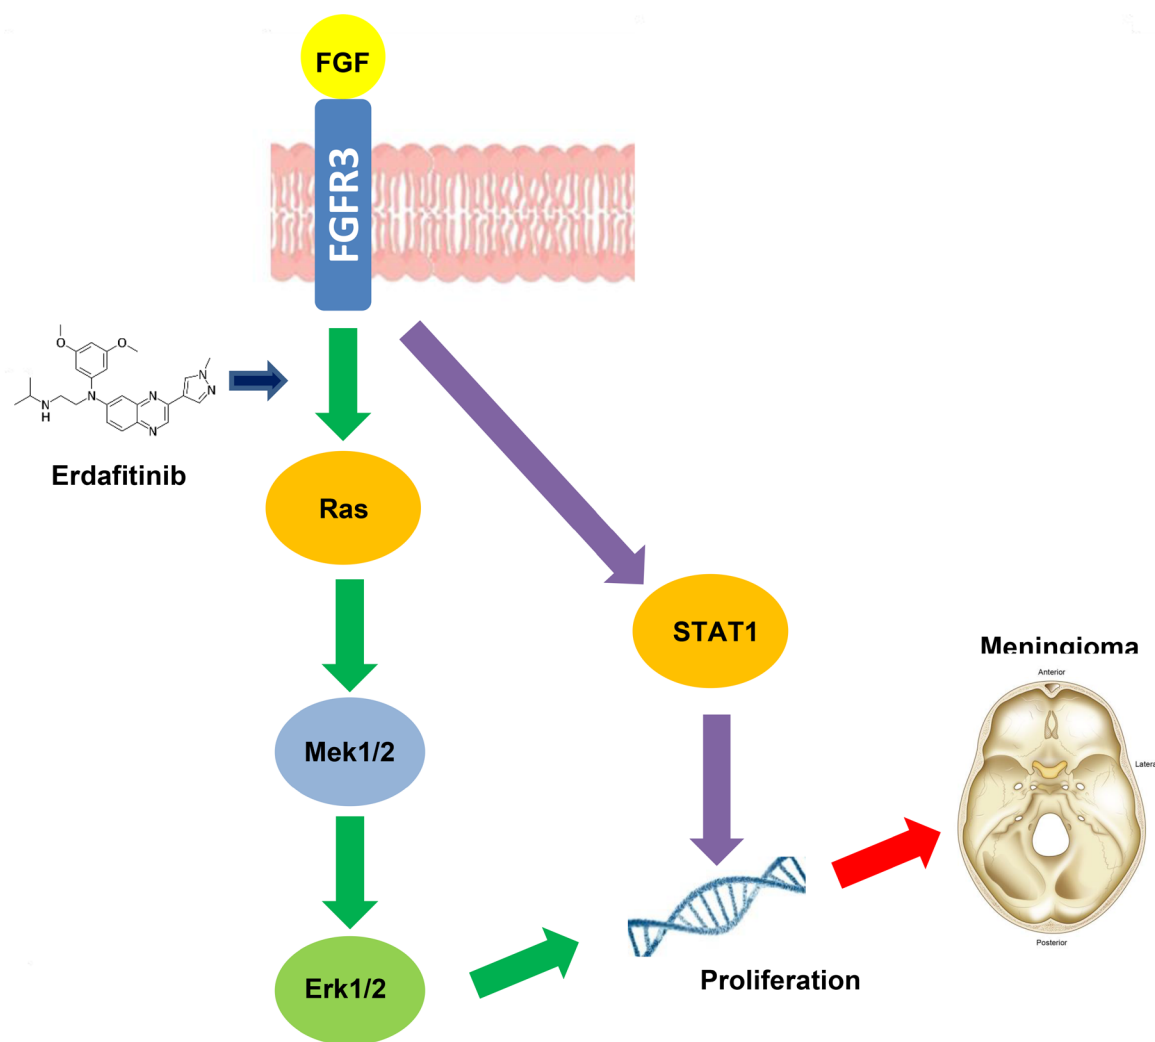

**Supplementary Figure 1.** Network of FGFR3 kinase reactions which transmit pro-proliferative signals identified in meningioma tumors in the study.

**Supplementary Table 1: Demographic characteristics of 71 patients with meningioma's.**

---

|                                       |                                 |
|---------------------------------------|---------------------------------|
| <b>Age, y, mean ± SD/median/range</b> | 54.8 years (range 27–96 years). |
| <b>Sex</b>                            |                                 |
| <b>Female</b>                         | 51 (71.83%)                     |
| <b>Male</b>                           | 20 (26.17%)                     |
| <b>Localization</b>                   |                                 |
| <b>Anterior</b>                       | 21                              |
| <b>Middle</b>                         | 17                              |
| <b>Posterior</b>                      | 13                              |
| <b>Primary tumors</b>                 | 60 (84.51%)                     |
| <b>Recurrent tumors</b>               | 10 (14.08%)                     |
| <b>Grade</b>                          |                                 |
| <b>1</b>                              | 57 (80.28 %)                    |
| <b>2</b>                              | 13 (18.30%)                     |
| <b>3</b>                              | 1 (1.40%)                       |
| <b>Postoperative irradiation</b>      | 12 (16.90%)                     |

---

**Supplementary Table 2: Patient mutational data.** See Supplementary\_Table\_2
